# Supplementary material
Source: MDPI journal article supplement (https://www.mdpi.com/2071-1050/10/2/471)
Supplement: s1 [file s1]

**Supporting Information**

Evaluating Performance and Elucidating the Mechanisms of Collaborative Development within the Beijing–Tianjin–Hebei Region, China

Chuanglin Fang 1,2, Kui Luo 1,2,*, Yunlong Kong 3, Haoxi Lin 1,2 and Yufei Ren 1,2

1 Institute of Geographic Sciences and Natural Resources Research, Chinese Academy of Sciences, Beijing 100101, China; fangcl@igsnrr.ac.cn (C.F.); linhx.14b@igsnrr.ac.cn (H.L.); renyf.17b@igsnrr.ac.cn (Y.R.)

2 College of Resources and Environment, University of Chinese Academy of Sciences, Beijing 100049, China

3 Institute of Remote Sensing and Digital Earth, Chinese Academy of Sciences, Beijing 100101, China; kongyl@radi.ac.cn

***** Correspondence: luok.15b@igsnrr.ac.cn; Tel.: +86-010-6488-9101

Academic Editor: name

Received: date; Accepted: date; Published: date

**Table S1 Results of Granger causality test.**

| Null Hypothesis: | Obs | F-Statistic | Prob. |
| --- | --- | --- | --- |
| FI does not Granger Cause Y | 15 | 1.4621 | 0.2519 |
| Y does not Granger Cause FI | 15 | 0.8844 | 0.3672 |
| FE does not Granger Cause Y | 15 | 0.6999 | 0.4206 |
| Y does not Granger Cause FE | 15 | 0.2276 | 0.6427 |
| FE does not Granger Cause FI | 15 | 0.0641 | 0.8047 |
| FI does not Granger Cause FE | 15 | 3.8896 | 0.0743 |

Note: Y represents collaborative development performance, FI represents per capita fixed asset investment and FE represents per capita fiscal expenditure, respectively.

(Source: Eviews software, author’s elaboration)
